# Supplementary material for: Estrogen and Progesterone Receptors Are Dysregulated at the BPH/5 Mouse Preeclamptic-Like Maternal–Fetal Interface
Source: MDPI journal article supplement (doi:10.3390/biology13030192), 2024-03-16
Supplement: s1 [file s1]

# Estrogen and Progesterone Receptors are Dysregulated at the BPH/5 Mouse Preeclamptic-Like Maternal–Fetal Interface

Viviane C. L. Gomes <sup>1</sup>, Bryce M. Gilbert <sup>1</sup>, Carolina Bernal <sup>1</sup>, Kassandra R. Crissman <sup>2</sup>, and Jenny L. Sones <sup>3\*</sup>

<sup>1</sup> Department of Small Animal Clinical Sciences, Michigan State University College of Veterinary Medicine, East Lansing, MI 48824, United States.

<sup>2</sup> Department of Veterinary Clinical Sciences, Louisiana State University School of Veterinary Medicine, Baton Rouge, LA 70803, United States.

<sup>3</sup> Colorado State University Equine Reproduction Laboratory, Fort Collins, CO 80521, United States.

\* Correspondence: jenny.sones@colostate.edu

## Supplementary Material

**Table S1.** Forward and reverse *Mus musculus*-specific primer sequences used in qRT-PCR

| Gene            | Primer Sequence                                                          |
|-----------------|--------------------------------------------------------------------------|
| <i>18S</i>      | F: GTAACCCGTTGAACCCCATTT<br>R: CCATCCAATCGGTAGTAGCG                      |
| <i>Esr1</i>     | F: AAT TCT GAC AAT CGA CGC CAG<br>R: GTG CTT CAA CAT TCT CCC TCC TC      |
| <i>Esr2</i>     | F: CGG TCT GTC TGA ATG TGG TCA CTG<br>R: TTG CCT TGG TCA TGG TAT CGC TTC |
| <i>Pr-A/B/C</i> | F: GAC ACT GGC TGT GGA ATT TCC<br>R: CCA GGA TCT TGG GCA ACT G           |
| <i>Pr-A/B</i>   | F: CTG GAG ACC GAG GGC TCT<br>R: CCA GTG CTC GAG GTT TGC TC              |
| <i>Pr-B</i>     | F: GTG GAG GGC GCT TTC TCT G<br>R: TCT GCC TCC CTC CCT ATG AGT           |
